# Supplementary material for: ADEPT, a dynamic next generation sequencing data error-detection program with trimming
Source: PubMed Central journal article supplement (PMC4772517; doi:10.1186/s12859-016-0967-z), 2016-02-29

## Supplementary

**Table S1. Statistics for genomes and sequencing datasets used in this study.**

| Name                                                | Sequence length | G+C | Read length | # of pair reads | SRA                     | Accession #   |
|-----------------------------------------------------|-----------------|-----|-------------|-----------------|-------------------------|---------------|
| <i>Burkholderia thailandensis</i> 34 <sup>1</sup>   | 3,896,054       | 68% | 101         | 42,950,955      | SRX498885 <sup>a</sup>  | CP010017.1    |
| <i>Yersinia aldovae</i> 670-83 <sup>1</sup>         | 4,471,088       | 48% | 101         | 30,025,126      | SRX869060 <sup>a</sup>  | CP009781.1    |
| <i>Francisella philomiragia</i> <sup>1</sup>        | 2,017,393       | 33% | 241         | 13,997,096      | SRX1159901 <sup>a</sup> | CP010019.1    |
| <i>Bacillus anthracis</i> Ames BA1004               | 5,503,972       | 36% | 100         | 36,679,066      | SRX856499 <sup>a</sup>  | CP009981.1    |
| <i>Burkholderia thailandensis</i> 2002721723        | 6,577,133       | 70% | 101         | 47,883,213      | SRX729936 <sup>a</sup>  | CP004097.1    |
| <i>Serratia plymuthica</i> RVH1 <sup>1</sup>        | 5,514,320       | 50% | 150         | 34,899,793      | Gp0012814 <sup>b</sup>  | ARWD0100001.1 |
| <i>Serratia marcescens</i> FG194 <sup>1</sup>       | 4,858,216       | 36% | 150         | 8,989,515       | Gp0009213 <sup>c</sup>  | CP003942.1    |
| <i>Burkholderia dolosa</i> AU0158 <sup>2</sup>      | 6,420,400       | 67% | 101         | 18,019,832      | SRX1134792 <sup>a</sup> | CP009795.1    |
| <i>Francisella philomiragia</i> O#319L <sup>3</sup> | 2,017,400       | 33% | 101         | 2,797,931       | SRX869092 <sup>a</sup>  | CP010019.1    |

a. available at <https://www.ncbi.nlm.nih.gov/>

b. available at <https://gold.jgi.doe.gov/project?id=Gp0012814>

c. available at <https://gold.jgi.doe.gov/project?id=Gp0009213>

1. HiSeq, 2000, RTA 1.12, created in 2011.

2. HiSeq, 2000, RTA 1.12.4.2, created in 2015.

3. MiSeq, RTA 2.4.6, Created in 2015.

**Table S2. Statistic of Burkholderia dolosa AU0158 (G+C 67%) assembly using Velvet (Version 1.2.08 ) with k=77.**

| Trimming method | Total number of reads | Average read length | # Contigs | Fold coverage | N50   | Maximum Contig Length | Total Number of Bases |
|-----------------|-----------------------|---------------------|-----------|---------------|-------|-----------------------|-----------------------|
| Untrimmed       | 36039664              | 101                 | 243       | 577.4         | 55441 | 192731                | 6303897               |
| ConDeTri        | 20536052              | 98.3                | 209       | 319.8         | 64491 | 197625                | 6312680               |
| BWA             | 36039664              | 95.4                | 200       | 545.2         | 77855 | 267319                | 6306591               |
| SolexaQA        | 36039664              | 81.1                | 192       | 463.2         | 71843 | 197625                | 6311857               |
| ADEPT           | 33272274              | 98.7                | 205       | 520.7         | 78943 | 267319                | 6306405               |

Figure S1. Comparison of predicted error rates with observed error rates. The solid line represents the theoretical, predicted error rate given a Q score,  $P=10^{(-Q/10)}$ , where Q is the Phred quality score and P is the predicted error rate. The actual error rates for all called Q scores are the mean values calculated from all nucleotide positions within all reads for the two datasets: *Burkholderia dolosa* (diamond), and *Francisella philomiragia* (triangle). 95% confidence limits were used as error bars. Due to the large amount of data sampled, the error bars are small and covered by the height of the symbol.

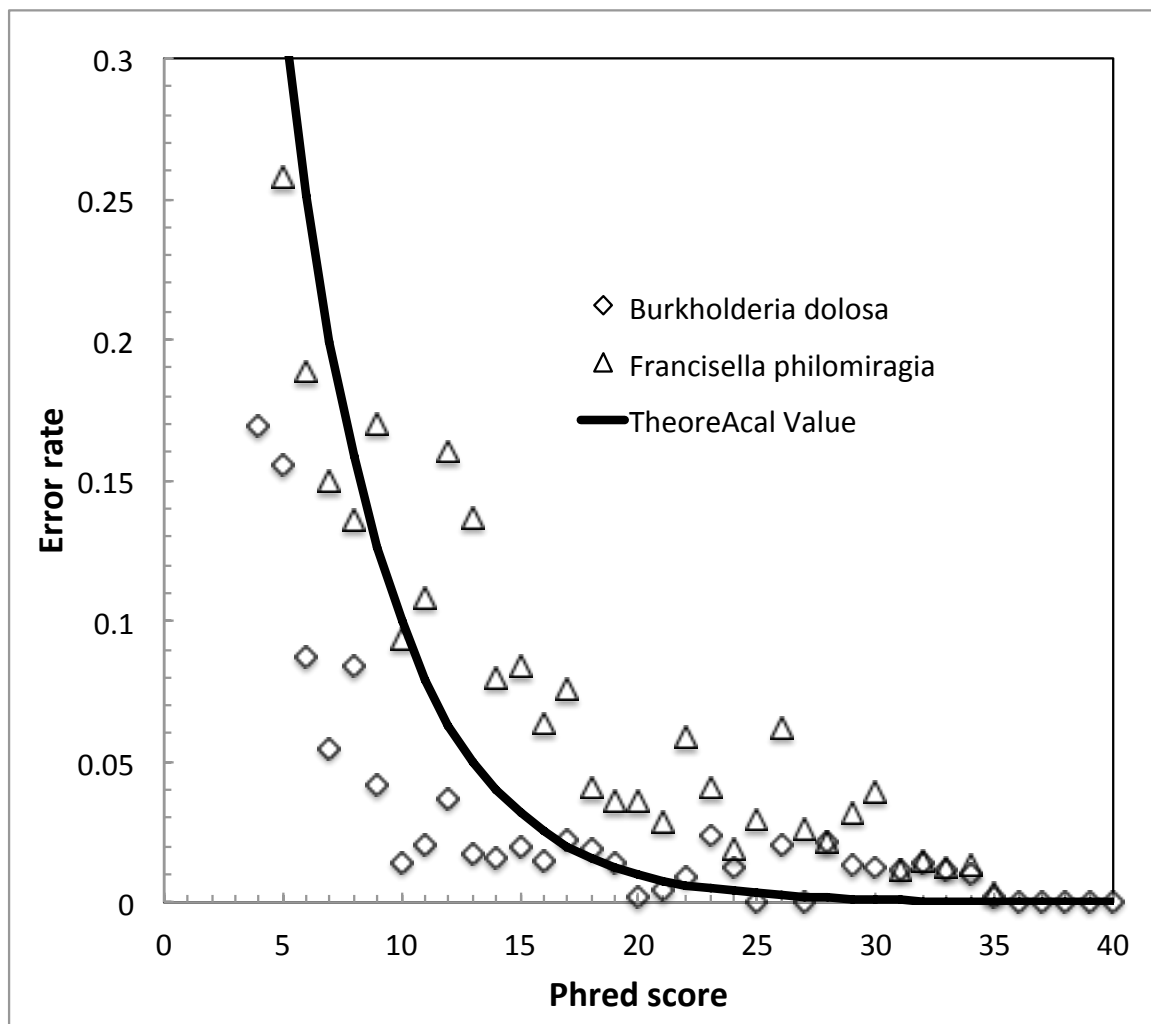

Figure S2a: Average quality scores along reads for erroneous bases and their adjacent bases, and for all the reads for *Yersinia aldovae*. The purple line represents the average quality score of the full Illumina run. The orange line represents the average quality score at erroneous base positions. The other lines represent average quality scores of bases near the erroneous base at positions -1, -2, -5, and -10

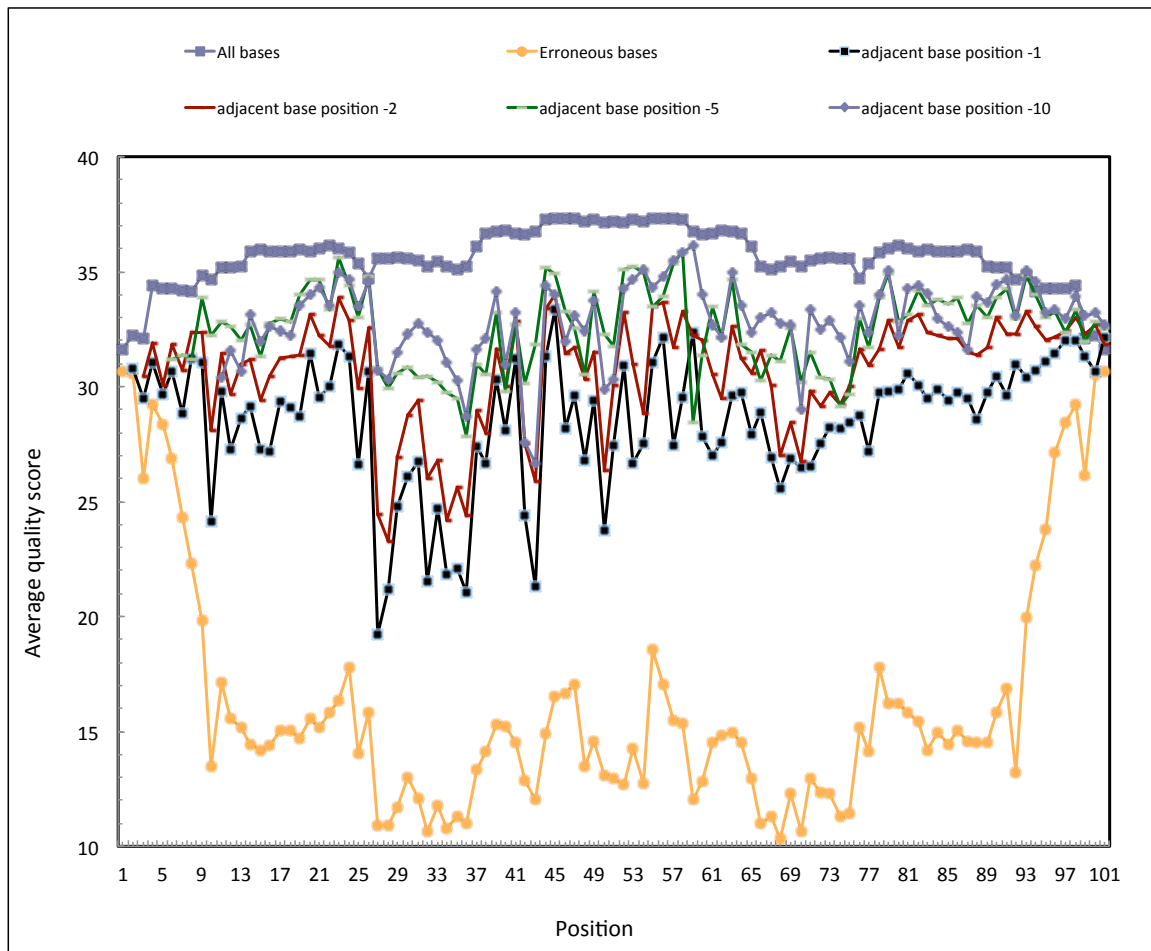

Figure S2b: Average quality scores along reads for erroneous bases and their adjacent bases, and for all the reads for *Yersinia aldovae*. The purple line represents the average quality score of the full Illumina run. The orange line represents the average quality score at erroneous base positions. The other lines represent average quality scores of bases near the erroneous base at positions +1, +2, +5, and +10.

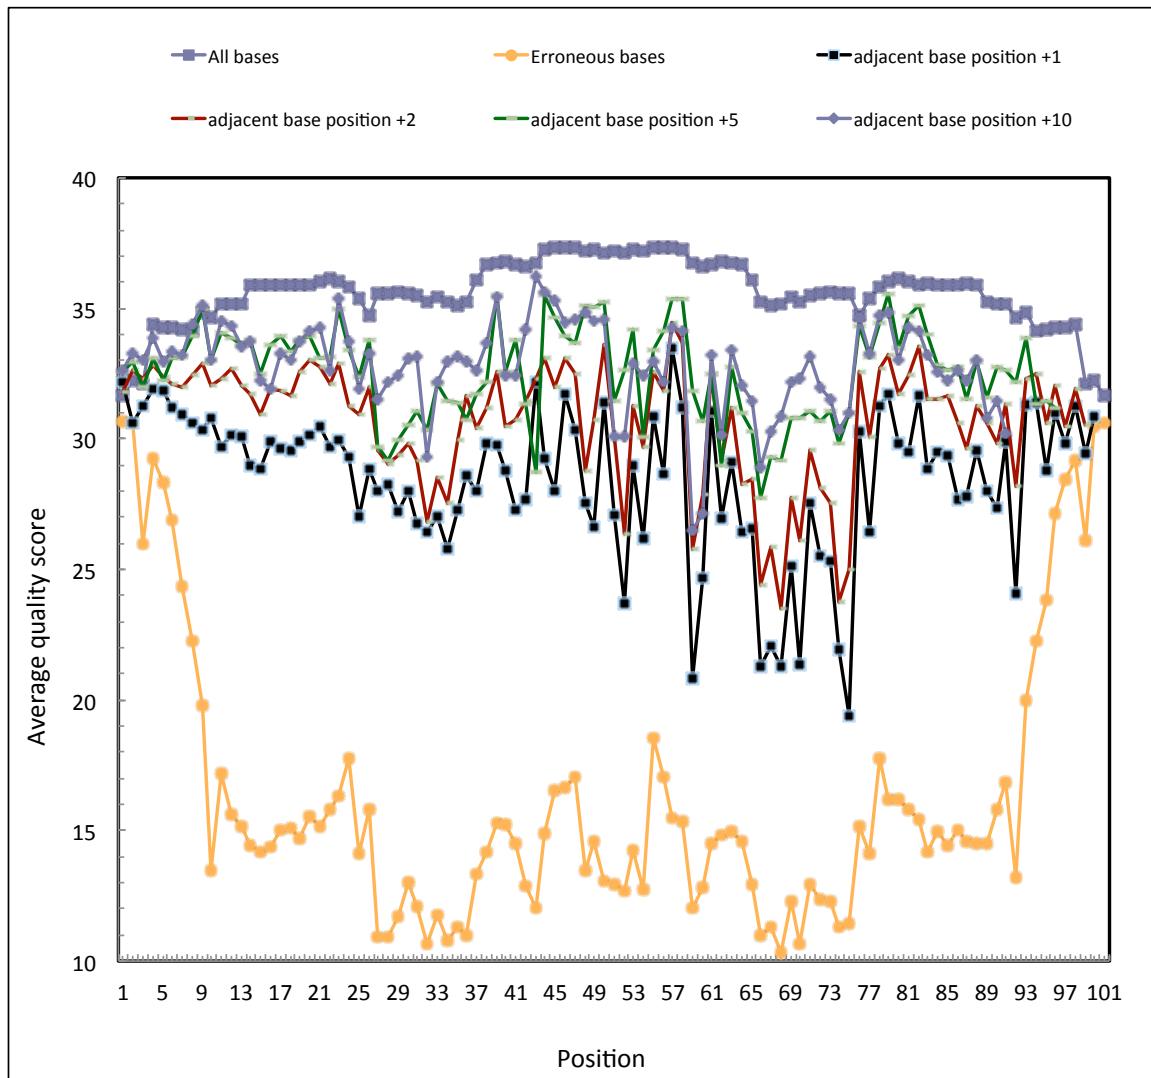

Figure S3a: Average quality scores along reads for erroneous bases and their adjacent bases, and for all the reads for *Francisella philomiragia*. The purple line represents the average quality score of the full Illumina run. The orange line represents the average quality score at erroneous base positions. The other lines represent average quality scores of bases near the erroneous base at positions -1, -2, -5, and -10.

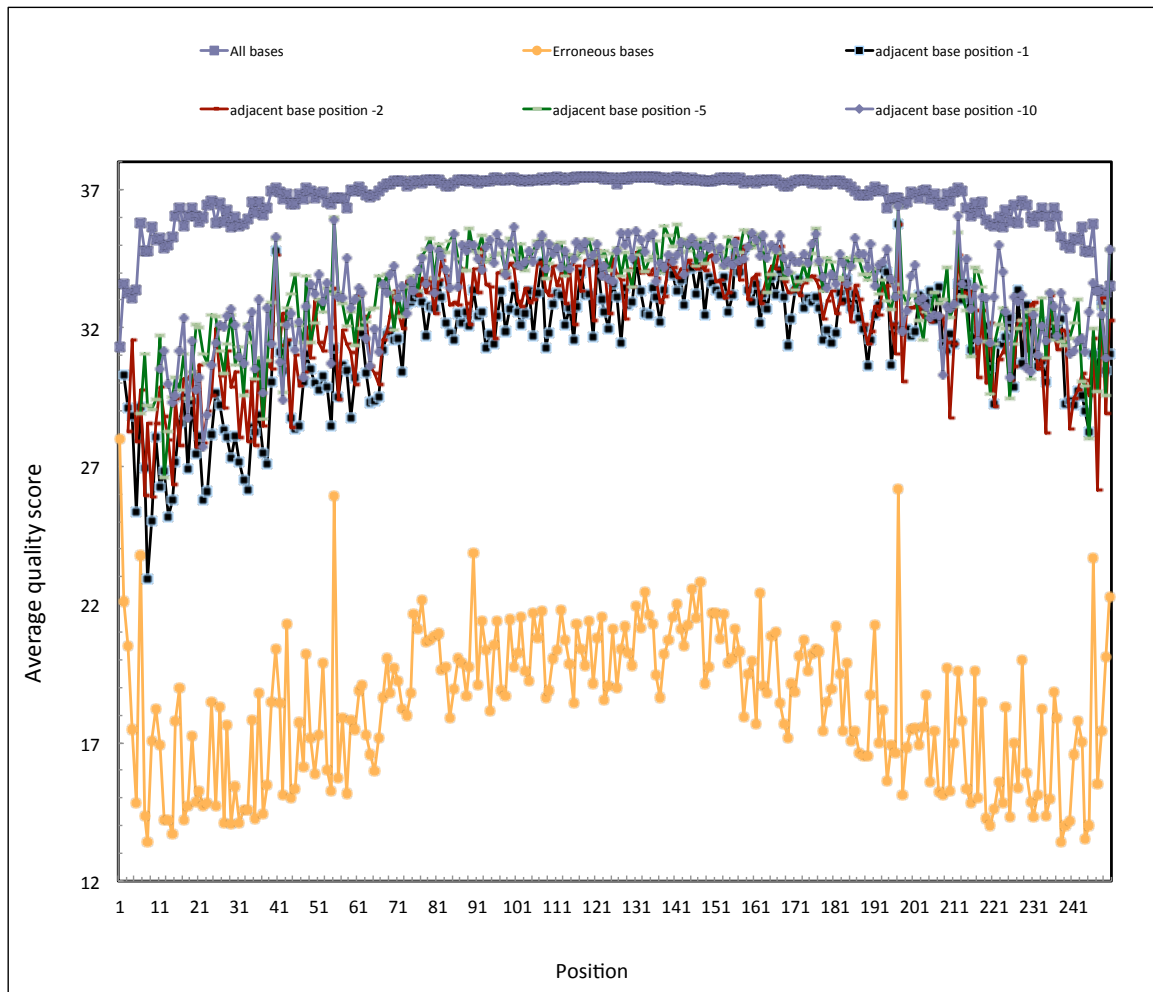

Figure S3b: Average quality scores along reads for erroneous bases and their adjacent bases, and for all the reads for *Francisella philomiragia*. The purple line represents the average quality score of the full Illumina run. The orange line represents the average quality score at erroneous base positions. The other lines represent average quality scores of bases near the erroneous base at positions +1, +2, +5, and +10.

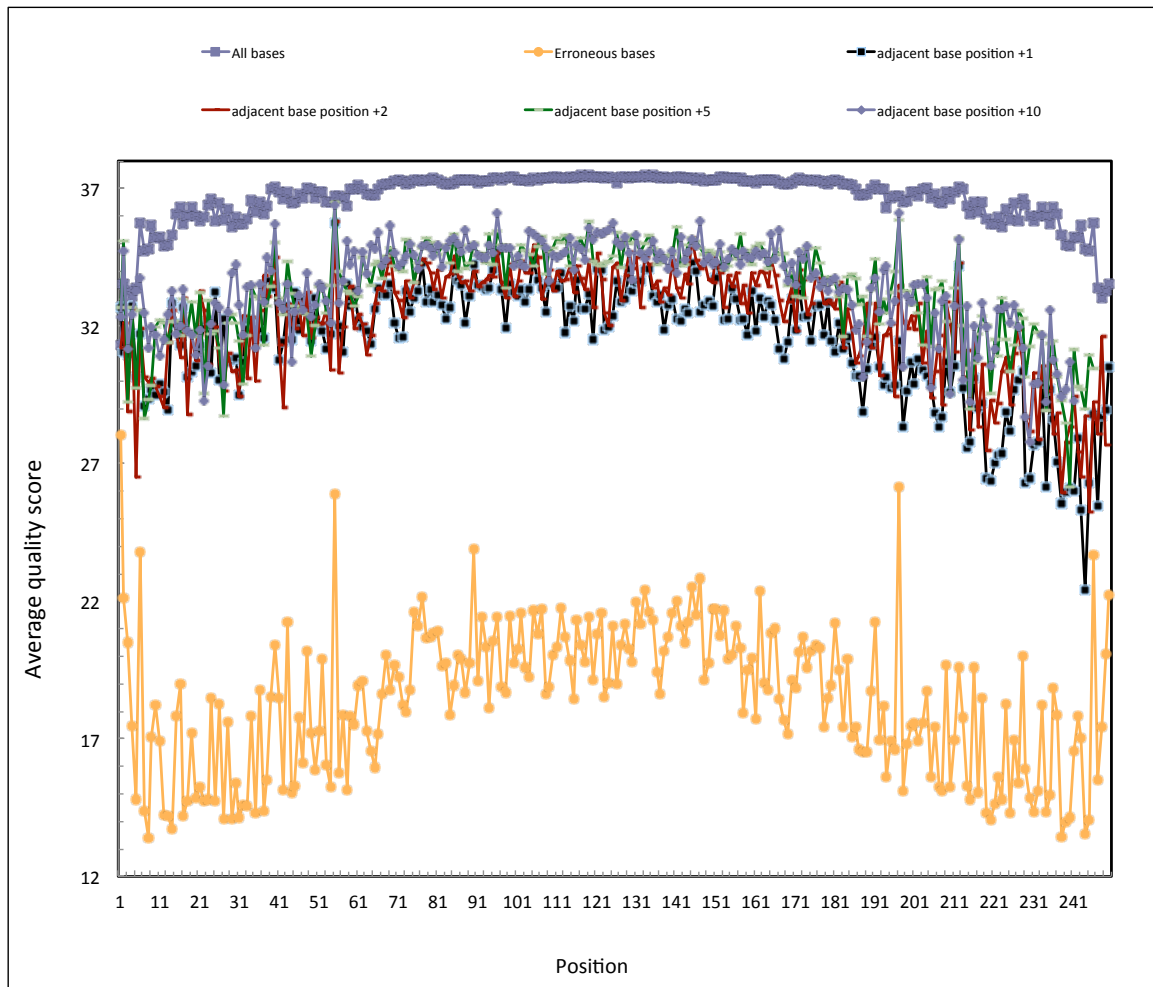

Figure S4. Fraction of known errors identified for *Bacillus anthracis* (G+C 36%) using five different methods. The five samples include using only the QC (Phred score) at the base considered (square), using QC at the base considered plus one adjacent upstream/downstream bases(triangle), using QC at the base considered plus two adjacent upstream/downstream bases(circle), using QC at the base considered plus three adjacent upstream/downstream bases(diamond), and using QC at the base considered plus one a random base(star).Y axis represents the fraction of the known errors identified by method; X axis represents the position within the reads.

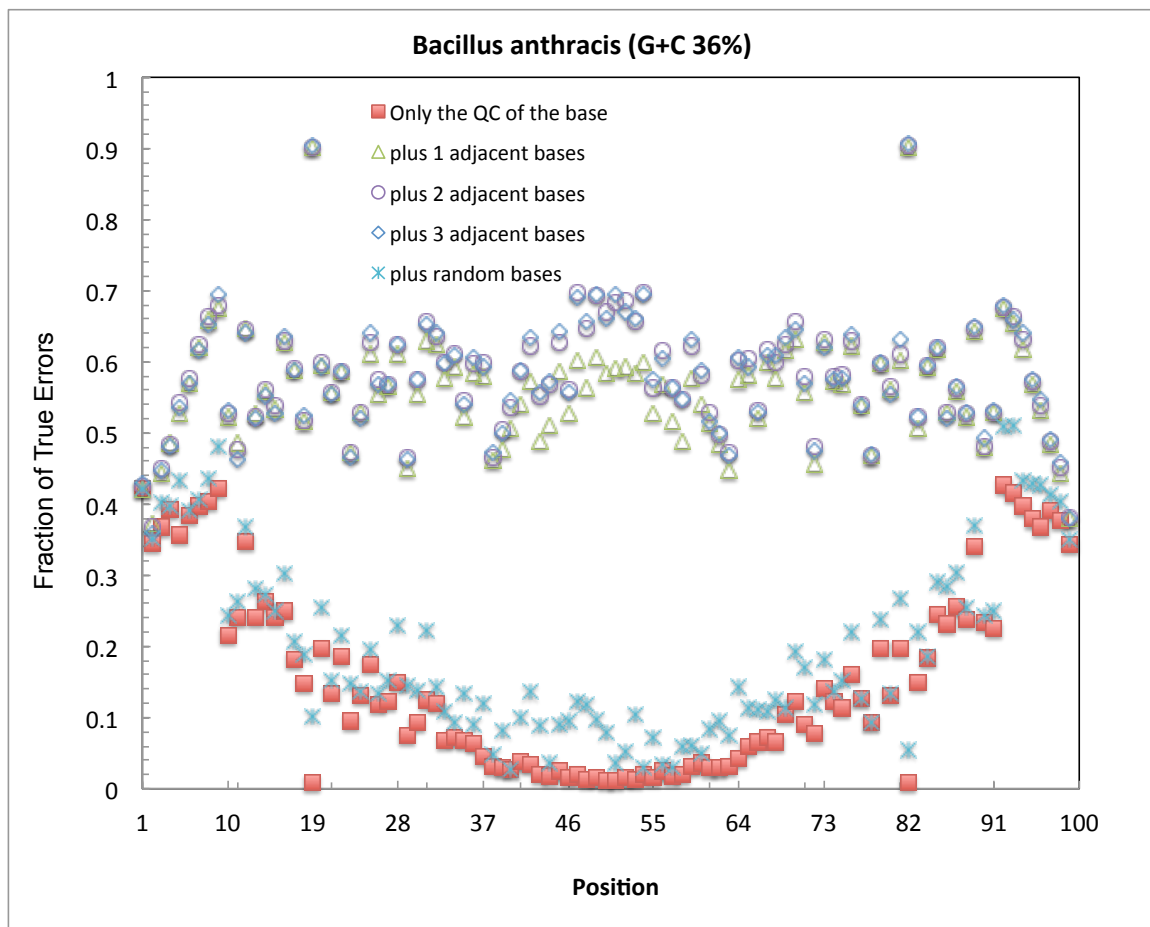



Figure S5. The ratio of false errors identified to the total number of reads by different methods at each base position. The four samples include *Bacillus anthracis*, *Serratia plymuthica*, *Burkholderia thailandensis*, and *Serratia plymuthica* that represent different range of GC contents. SolexaQA method shown as circle, BWA method shown as cross, ConDeTri shown as diamond and ADEPT method shown as triangle. The x-axis represents the position of the base. The y-axis represents the ratio of false errors identified to the total number of reads.

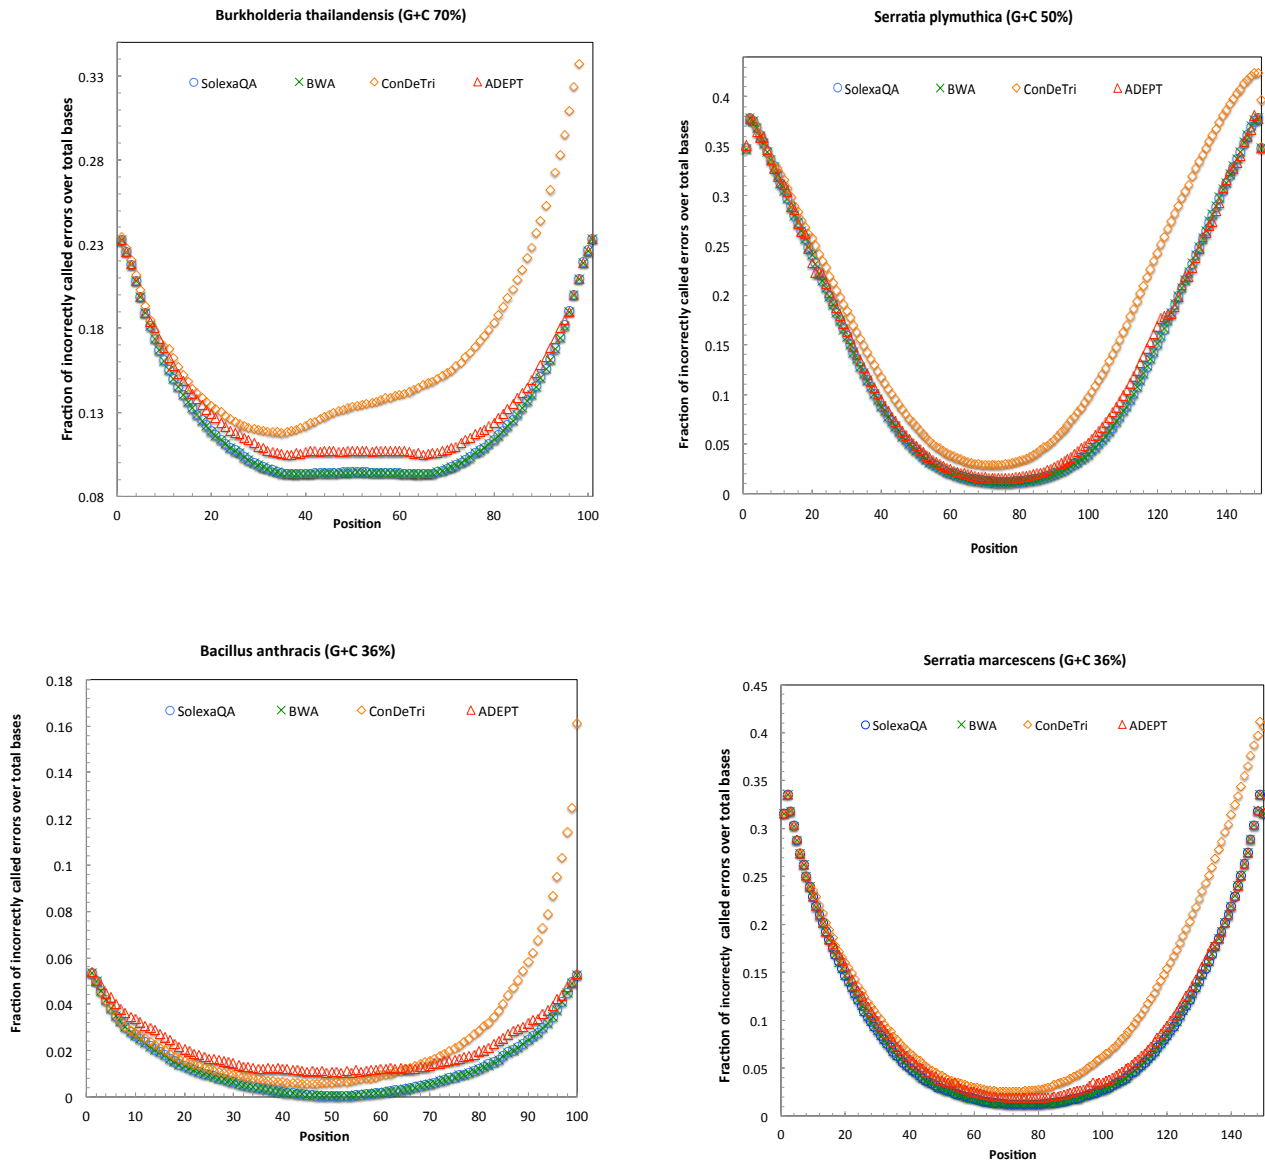

Supplement: 12859_2016_967_MOESM1_ESM.pdf [file 12859_2016_967_MOESM1_ESM.pdf]
